# Supplementary material
Source: ML conference proceedings conference paper supplement (https://openaccess.thecvf.com/content/ICCV2025/html/Ji_Customizing_Domain_Adapters_ICCV_2025_paper.html)
Supplement: Supplementary file 1 [file Ji_Customizing_Domain_Adapters_ICCV_2025_supplemental.pdf]

# Customizing Domain Adapters for Domain Generalization

## Supplementary Material

**More experimental details** We adopt the experimental setup introduced in [14, 63] as our framework for evaluating our domain generalization approach. This framework entails maintaining consistency in various aspects, including model selection criteria, dataset partitioning, and the utilization of the same network backbone to ensure comparability. In alignment with the methodology employed in DomainBed, we opt for the ViT-S/16 model, as recommended in [27]. Notably, this choice is motivated by its proximity to ResNet-50 in terms of parameter count and runtime memory usage. For our comparative analysis, we benchmark our approach against the most recent and top-performing domain generalization algorithms. We compare with both ViT-Small/16 (with 21.7 million parameters) and ResNet50 (with 25.6 million parameters), both pre-trained on ImageNet-1k, as our backbone models.

### Analysis of the domain adapters layer configuration

Two prevalent block placement methods, often referenced in existing research [46, 50], are “every-two” and “last-two”. “Every-two” involves situating the block in the even-numbered blocks, while “last-two” places the block in the final two even blocks, as illustrated in Figure 4 (a). Our empirical findings, presented in Table 10, indicate that “every-two” outperforms “last-two” in the context of our method.

| Method         | Layer Config | Acc (PACS)     |
|----------------|--------------|----------------|
| Domain Adapter | Every 2      | $89.4 \pm 0.3$ |
| Domain Adapter | Last 2       | $88.4 \pm 0.2$ |

Table 10. Analysis of layer configuration on PACS benchmark. For simplicity, we fix the domain adapter positioned after the MSA module and outside the residual connection of MSA here. “every-two” achieves better performance than “last-two” in our method.

**Analysis of domain adapters position in ViT block** We consider five different configurations of domain adapters within a vision transformer block, see Figure 4 (b). We empirically find that the first case achieves the best performance in Table 11.

| Method         | Position Config | Acc (PACS)     |
|----------------|-----------------|----------------|
| Domain Adapter | First case      | $89.4 \pm 0.3$ |
| Domain Adapter | Second case     | $88.9 \pm 0.3$ |
| Domain Adapter | Third case      | $88.6 \pm 0.1$ |
| Domain Adapter | Fourth case     | $84.5 \pm 0.4$ |
| Domain Adapter | Fifth case      | $83.6 \pm 0.5$ |

Table 11. Analysis of domain adapter position in ViT block on PACS benchmark. We fix layer configuration as “every 2” here. The first case achieves the best performance.

**Result of domain adapter customization with GPT guidance.** Similar to the tried-and-tested design choices in Ta-

| Dataset            | Domain 1   | Domain 2   | Domain 3     | Domain 4    | Domain 5  | Domain 6   |
|--------------------|------------|------------|--------------|-------------|-----------|------------|
| PACS adapter       | photo Conv | art Conv   | cartoon Conv | sketch ViT  | -         | -          |
| VLCS adapter       | VOC Conv   | LABEL Conv | CAL ViT      | SUN ViT     | -         | -          |
| OfficeHome adapter | clip ViT   | art ViT    | real ViT     | product ViT | -         | -          |
| Terra adapter      | L38 Conv   | L43 Conv   | L46 Conv     | L100 Conv   | -         | -          |
| DomainNet adapter  | clip ViT   | Info Conv  | paint Conv   | quick ViT   | real Conv | sketch ViT |

Table 12. GPT guided domain adapter customization for five benchmarks.

ble 8, GPT-guided adapter selection follows a similar trend in Table 12. Domains with limited color information, such as the sketch domain in the PACS dataset, are typically assigned ViT adapters, while more colorful domains, like photo and art, are matched with Conv adapters.

**Fully Finetune vs Only Adapter** In Table 13, we found that fully fine-tuning all network parameters leads to better performance than fine-tuning only the custom domain adapters and classifier, with a 1.2% improvement on the PACS dataset and a 3.0% improvement on the OfficeHome dataset. This improvement likely arises from the relatively small size of our pre-trained network, where fine-tuning only the adapter may not be adequate for downstream tasks. As a result, we adopt comprehensive fine-tuning strategies in all our experiments.

| Method               | Acc(OfficeHome) | Acc(PACS)      |
|----------------------|-----------------|----------------|
| Adapter & Classifier | $73.1 \pm 0.0$  | $88.2 \pm 0.2$ |
| Fully Finetune       | $76.1 \pm 0.1$  | $89.4 \pm 0.3$ |

Table 13. Analysis of Fully Finetune vs Only Adapter & Classifier.

**The robustness of our method to noisy domain IDs** In this section, we investigated the robustness of our CDA method to noisy domain IDs, as detailed in Table 14. Specifically, during training, we randomized 20% of the domain labels, meaning a domain-1 sample could be randomly reassigned to domain-2, and a domain-2 sample to domain-3, for example. The results show a slight degradation in performance when 20% of the domain labels are randomized, demonstrating CDA’s resilience to such noise.

**Compare with more methods** In this section, we compare our method with the previous SOTA approach using the same ViT-S/16 backbone. Specifically, we implemented PCL [59] within the same ViT-S/16 architecture. The results, achieving

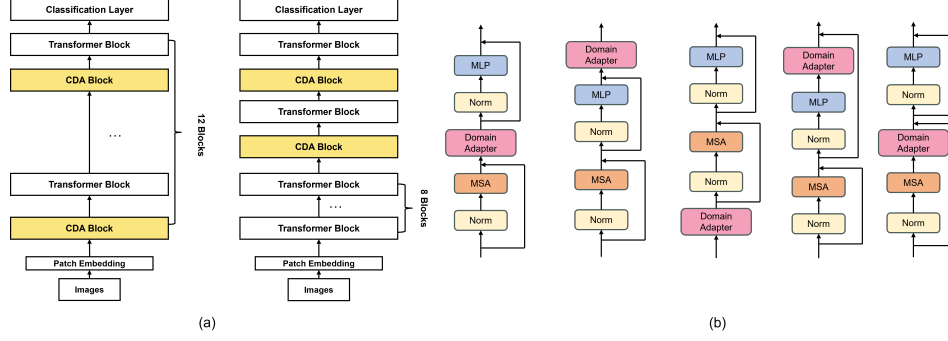

Figure 4. (a) Illustration of two different CDA layer configurations. The left: “every-two” placement. The right: “last-two” placement. (b) Illustration of five different configurations of a domain adapter within a vision transformer block. From left to right, the configurations are sequentially ordered from the first to the fifth case.

| Method                      | Acc(OfficeHome) | Acc(PACS)      |
|-----------------------------|-----------------|----------------|
| Original                    | $76.1 \pm 0.1$  | $89.4 \pm 0.3$ |
| 20% domain label randomized | $75.9 \pm 0.1$  | $88.8 \pm 0.4$ |

Table 14. Analysis of robustness to noisy domain IDs.

to leverage a broader range of information when making predictions, including more details such as the texture, color, and shape of objects.

74.4 $\pm$ 0.3 on OfficeHome and 48.5 $\pm$ 0.2 on DomainNet, fall short of those obtained by our CDA method in Table 15.

| Method    | Backbone | Acc(OfficeHome) | Acc(DomainNet) |
|-----------|----------|-----------------|----------------|
| PCL[59]   | ViT-S/16 | $74.4 \pm 0.3$  | $48.5 \pm 0.2$ |
| SWAD [6]  | ViT-S/16 | $73.8 \pm 0.2$  | $48.3 \pm 0.3$ |
| GMoE[27]  | ViT-S/16 | $74.2 \pm 0.4$  | $48.7 \pm 0.2$ |
| CDA(Ours) | ViT-S/16 | $76.1 \pm 0.1$  | $50.3 \pm 0.4$ |

Table 15. Compare with PCL [59] and SWAD [6] with the same ViT-S/16 backbone.

**Experiments Compute Resources** All experiments were conducted on an NVIDIA GeForce RTX 3090 graphics card with 24 GB of memory. Each individual experiment took approximately 30 minutes to run, with the total computation time for the entire project amounting to approximately 30 hours on the GPU.

### 5.1. Multi-head Attention Visualization

To gain deeper insights into how our method contributes to enhancing the domain generalization capabilities of the ViT model, we have visualized the attention maps for the last block of the ViT both with and without the integration of our method. These visualizations are presented in Figure 5 and Figure 6.

Our observations reveal that our method, the Customized Domain Adapters (CDA), tends to produce more comprehensive attention maps. This phenomenon could be attributed to using both ViT and CNN adapters within our model architecture. This combination potentially allows the model

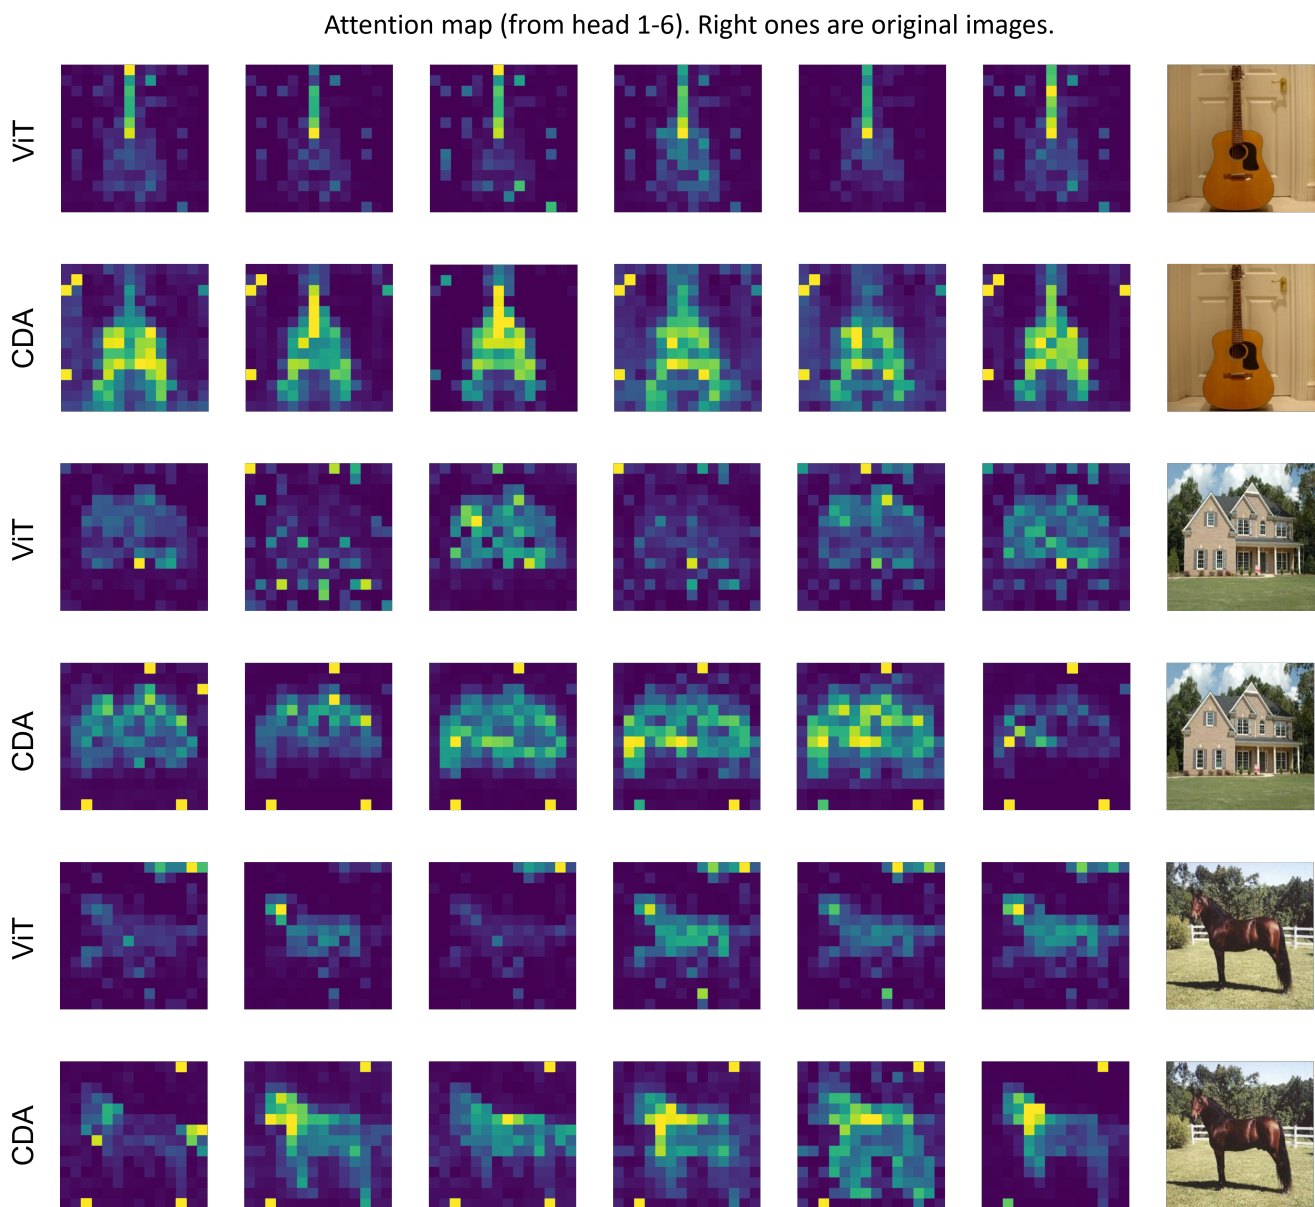

Figure 5. Multi-head attention visualization on the last block of ViT-S/16 and CDA-S/16. Images are from Photo domain in PACS.

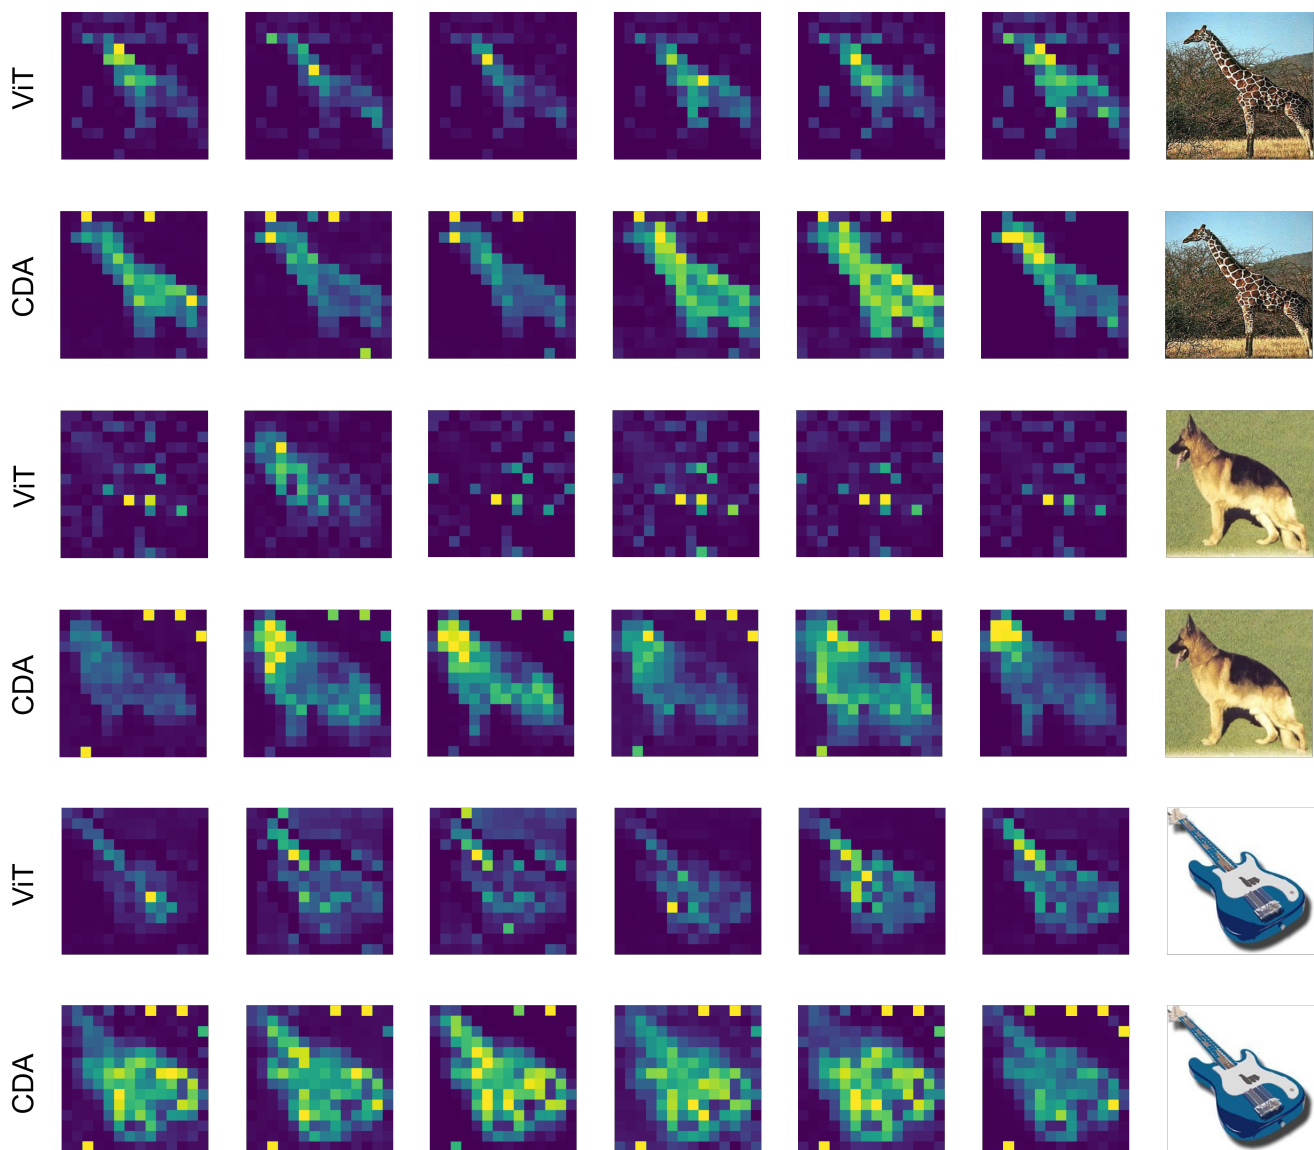

Figure 6. Multi-head attention visualization on the last block of ViT-S/16 and CDA-S/16. Images are from Photo domain in PACS.
